# Supplementary material
Source: MDPI journal article supplement (https://www.mdpi.com/2073-4433/12/7/905)
Supplement: s1 [file s1]

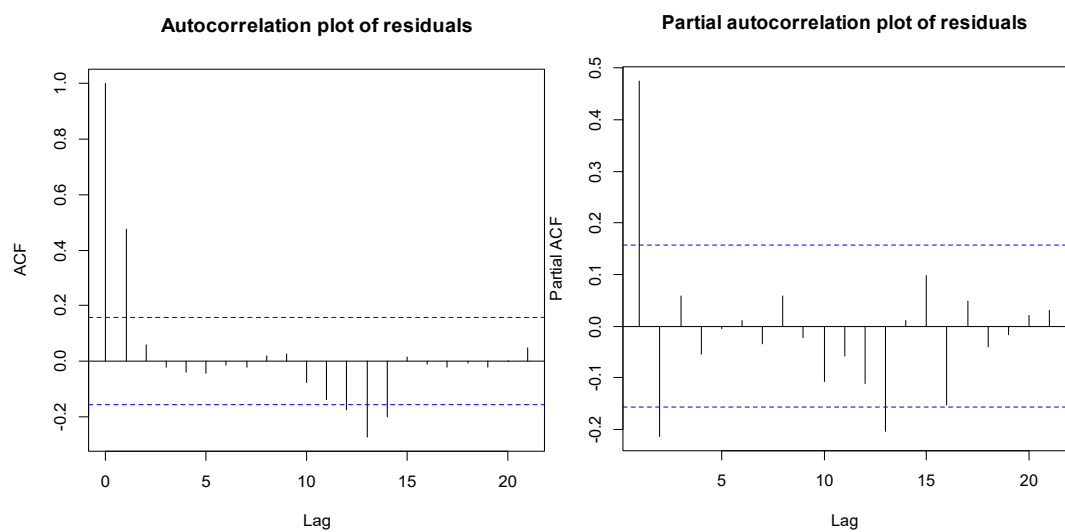

**Figure S4.** Autocorrelation and partial autocorrelation plot of residuals in the city of Dhaka, Bangladesh for the 13-year study period (2001-2013).  
Note: Lag scale = 1
