# Supplementary material
Source: MDPI journal article supplement (https://www.mdpi.com/2073-4433/12/7/905)
Supplement: s1 [file s1]

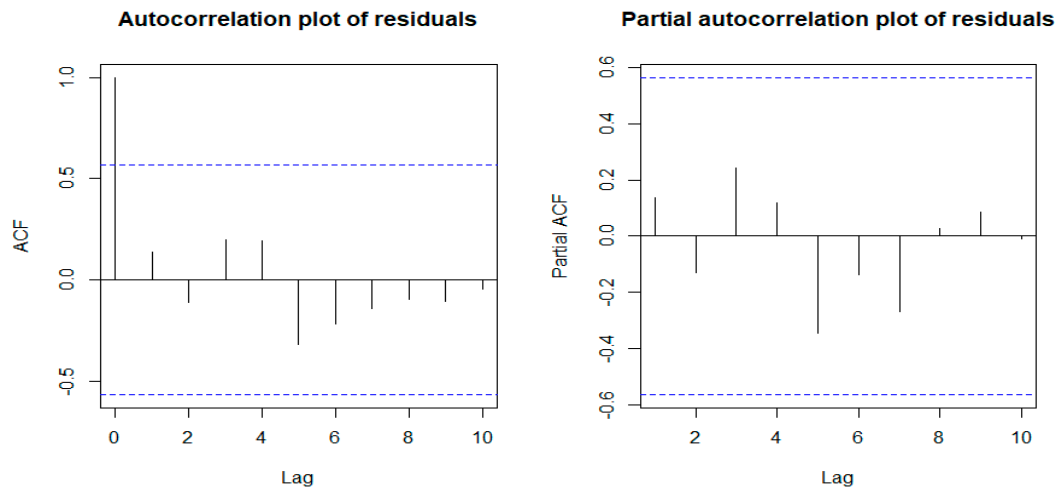

**Figure S1.** ACF and PACF plots for CI in relation to the climatic parameters. The PACF plot indicating that the residuals in the fitted model were uncorrelated with mean zero and constant variance.
