# Supplementary material
Source: MDPI journal article supplement (https://www.mdpi.com/2073-4433/12/7/905)
Supplement: s1 [file s1]

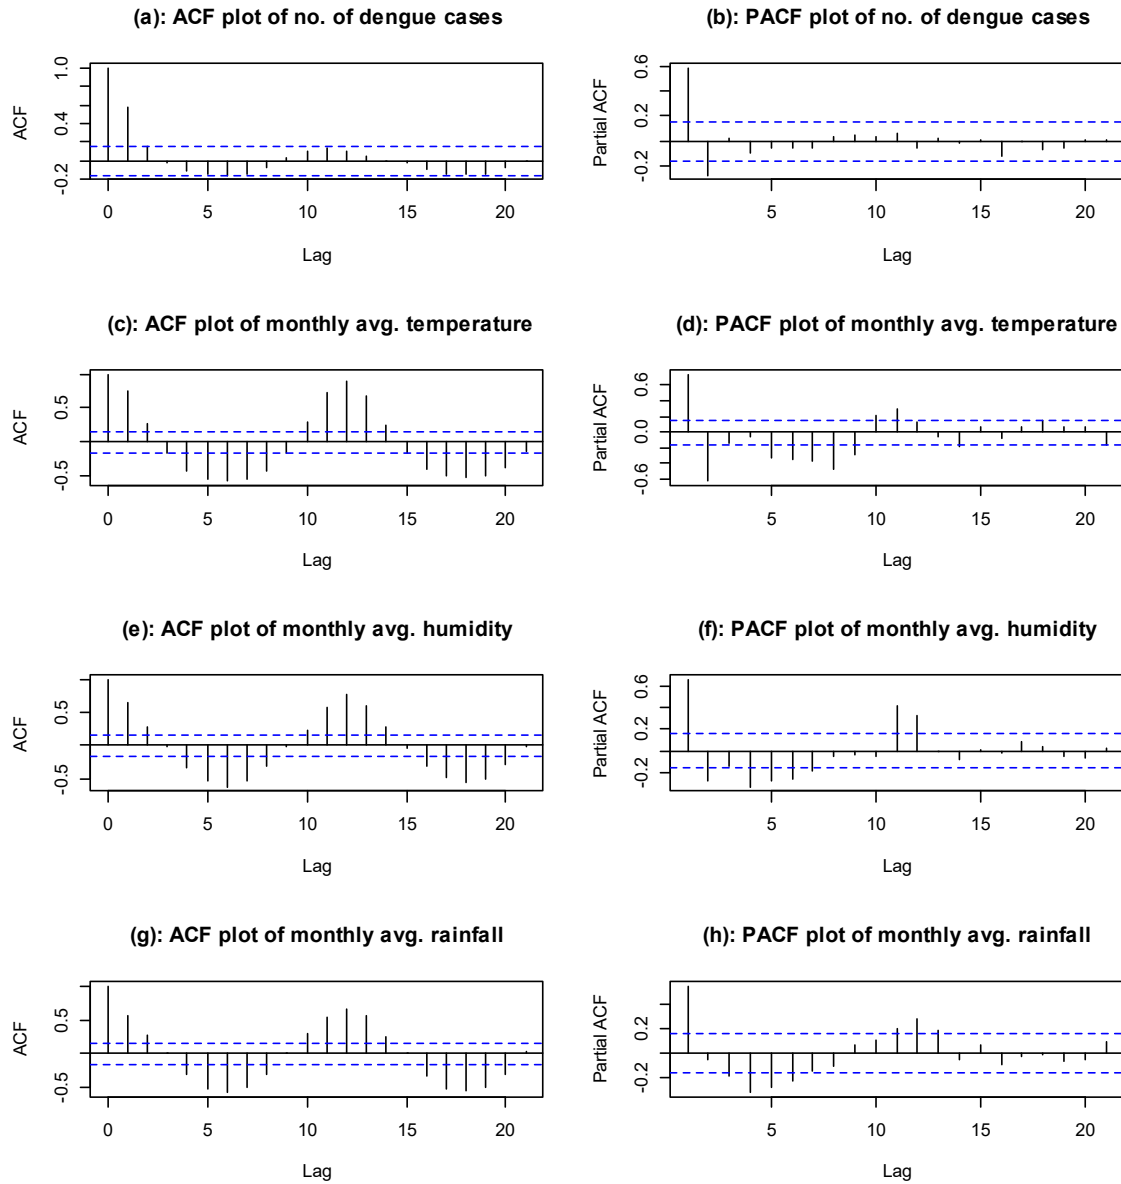

**Figure S3.** Autocorrelation and partial autocorrelation plots for the number of dengue cases vs. climate factors by month for the 13-year study period (2001-2013): (a and b) number of dengue cases; (c and d) average temperature; (e and f) average relative humidity; and (g and h) average rainfall.

Note: The values of the autocorrelation function (ACF) and partial autocorrelation function (PACF) in Fig. S3 (a), (b), (c), (d), (e), (f), (g) and (h) show us the autoregressive and moving average orders, respectively while depicting the seasonal cyclical cycles.
